# Supplementary material for: Effects of Renal Impairment on the Pharmacokinetics of Once-Daily Amantadine Extended-Release Tablets
Source: PubMed Central journal article supplement — CNS Drugs. 2019 Jul 24;33(8):783–9. doi: 10.1007/s40263-019-00651-1 (PMC6669187; doi:10.1007/s40263-019-00651-1), 2019-07-24
Supplement: 40263_2019_651_MOESM1_ESM.pdf [file 40263_2019_651_MOESM1_ESM.pdf]

## Supplementary Figures/Tables

### Effects of Renal Impairment on the Pharmacokinetics of Once-Daily Amantadine Extended-Release Tablets

*CNS Drugs*

Tina deVries, PhD<sup>1</sup>; Angela Dentiste, MBA<sup>1</sup>; Clifford Di Lea, RPh, PharmD<sup>2</sup>; Vincent Pichette, MD, PhD<sup>3</sup>; David Jacobs, MD, MBA<sup>1</sup>

<sup>1</sup>Osmotica Pharmaceutical US LLC, Bridgewater, NJ, USA

<sup>2</sup>Aclairo Pharmaceutical Development Group, Inc., Vienna, VA, USA

<sup>3</sup>Hôpital Maisonneuve-Rosemont, Montreal, Quebec, Canada

Corresponding Author:

David Jacobs, MD, MBA

Osmotica Pharmaceutical US LLC

400 Crossing Boulevard, Bridgewater, NJ 08807

Tel: 1-908-809-1364

Email: [djacobs@osmotica.com](mailto:djacobs@osmotica.com)

**Supplementary Table 1.** Simulated steady state model independent PK parameters for subjects with varied CrCl receiving 129-mg amantadine ER tablet every  $\tau$  hours

| $\tau$<br>h | CrCl<br>(mL/min) | $C_{avg}$ (ng/mL) |
|-------------|------------------|-------------------|
| 24          | 158              | 300               |
|             | 114              | 415               |
|             | 90               | 526               |
| 48          | 90               | 263               |
|             | 75               | 315               |
|             | 60               | 394               |
| 72          | 60               | 263               |
|             | 45               | 350               |
|             | 30               | 525               |
| 96          | 45               | 263               |
|             | 30               | 394               |
|             | 22               | 537               |
| 120         | 30               | 315               |
|             | 22               | 429               |
|             | 15               | 625               |
| 168         | 15               | 447               |

$\tau$ , dose interval;  $C_{avg}$ , average steady state plasma concentration during a dose interval; CrCl, creatinine clearance; ER, extended-release; PK, pharmacokinetic.

**Supplementary Figure 1. Study design**

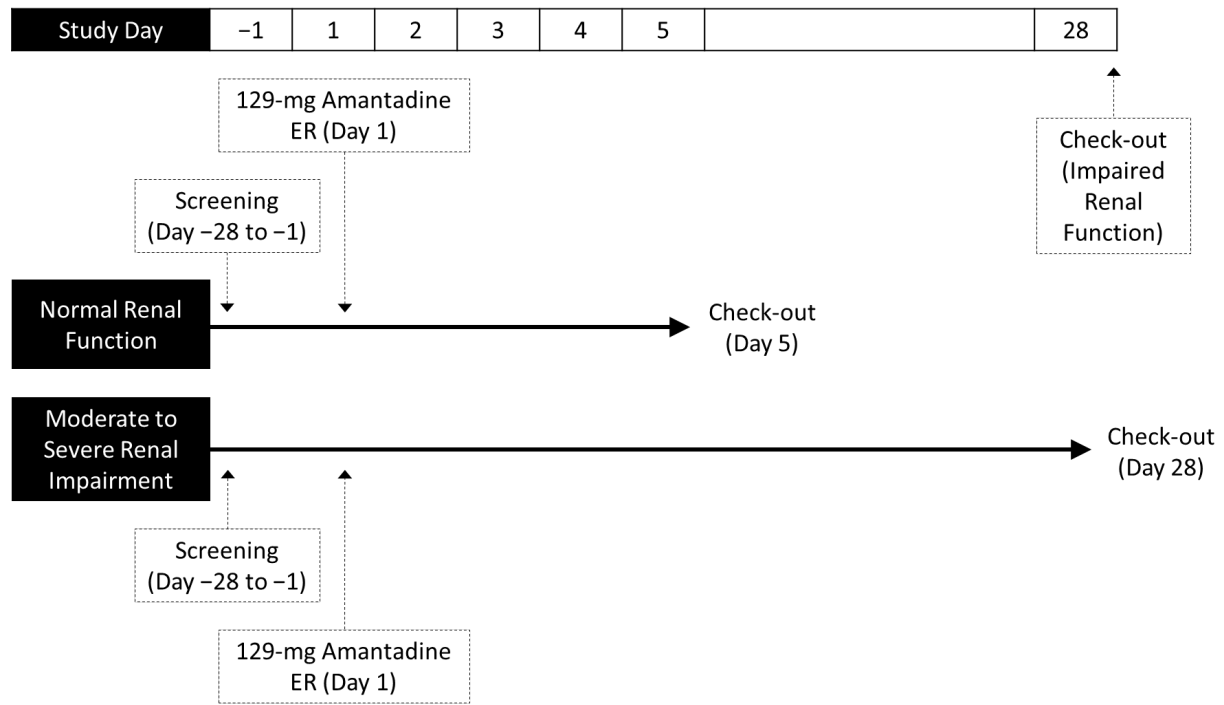

ER, extended-release.

**Supplementary Figure 2.** Relationship between amantadine renal clearance and eGFR following a single oral dose of 129-mg amantadine ER tablets in subjects with moderate or severe renal impairment and normal renal function

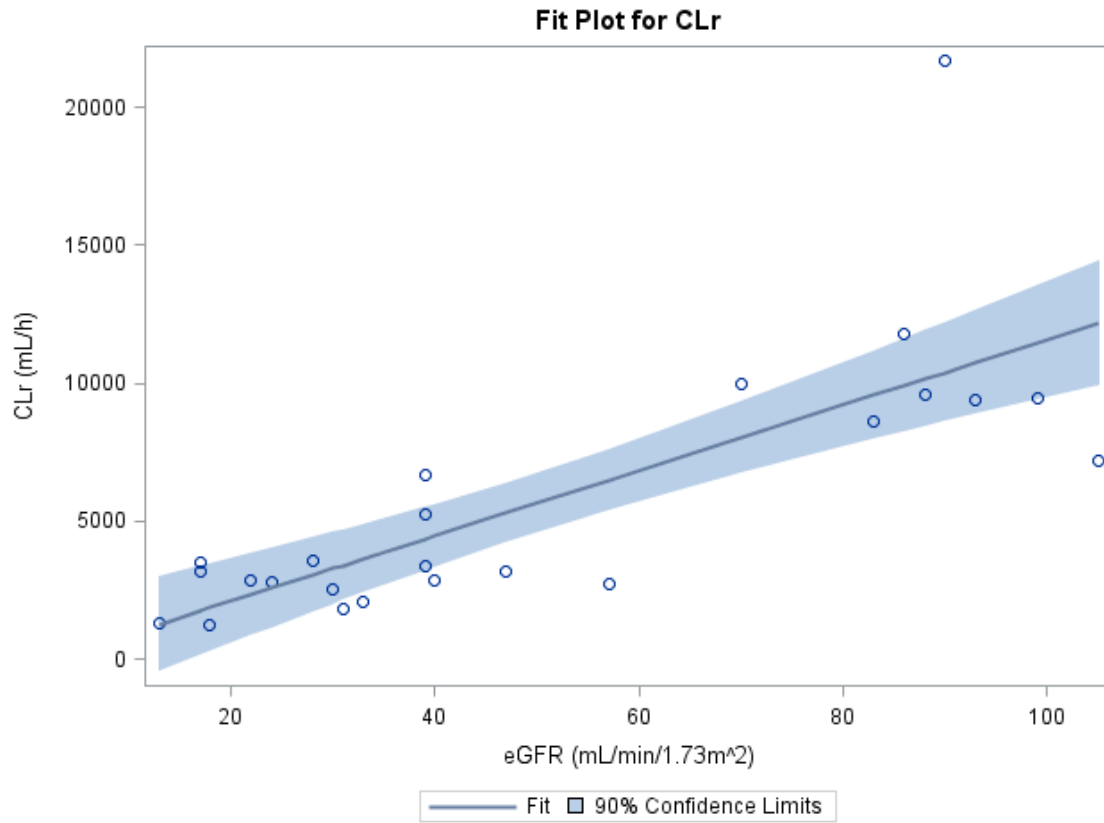

CLr, renal clearance; eGFR, estimated glomerular filtration rate; ER, extended-release.
